# Supplementary material
Source: PubMed Central journal article supplement (PMC5042361)

# Kinetic Analysis of an Efficient DNA-dependent TNA Polymerase

## Supplementary Material

*Allen Horhota,<sup>2</sup> Keyong Zou,<sup>1</sup> Justin K. Ichida,<sup>1</sup> Biao Yu,<sup>3</sup> Larry W. McLaughlin,<sup>2</sup> Jack W.  
Szostak<sup>1</sup> and John C. Chaput<sup>1†\*</sup>*

<sup>1</sup>Howard Hughes Medical Institute, and Department of Molecular Biology, Massachusetts General Hospital, Boston,  
MA 02114

<sup>2</sup>Department of Chemistry, Boston College, Chestnut Hill, MA 02467

<sup>3</sup>State Key Laboratory of Bioorganic and Natural Products Chemistry, Shanghai Institute of Organic Chemistry,  
Chinese Academy of Sciences, Shanghai 200032, China

**To whom correspondence should be addressed. Telephone: (480) 727-0392 email: john.  
chaput@asu.edu**

## Steady State Reactions Experimental Methods.

$\alpha$ -L-Threofuranosyl nucleoside triphosphates were synthesized as described by Zou et. al<sup>1</sup>. Stopped start single nucleotide incorporation kinetic experiments were conducted according to the method described by Goodman<sup>2</sup>. Reactions were carried out in 20  $\mu$ l of 20 mM Tris-HCl, 10 mM KCl, 10 mM (NH<sub>4</sub>)<sub>2</sub>SO<sub>4</sub>, 20 mM MgSO<sub>4</sub>, 0.1% Triton X-100, 0.25  $\mu$ g/ $\mu$ l BSA, 100  $\mu$ M DTT with 0.05 units of Terminator DNA Polymerase (New England Biolabs) with or without the addition of freshly prepared MnCl<sub>2</sub>. Reaction solutions were preheated at 55° C and initiated by the addition of 10  $\mu$ l of 2X NTP to an equal volume of solution containing both polymerase and P<sup>32</sup> labeled primer template complex. Reaction times were designed to limit total primer extension to 20% (typically 1-3 min) at which time the reactions were quenched by the addition of stop buffer containing 8M urea, 100 mM EDTA, and 1X TBE buffer. Samples were analyzed using 20% denaturing PAGE followed by phosphorimaging and quantitation on a Bio-Rad Molecular Imager FX. The insertion kinetic parameters of V<sub>max</sub> and K<sub>m</sub> were determined using Hanes-Woolf plots to give an overall insertion efficiency for each NTP.

## References

1. Zou, K.; Horhota, A.; Yu, B.; Szostak, J.W.; McLaughlin, L.W. *Org. Lett.* **2005**, In press.
2. (a) Boosalis, M. S.; Petruska, J.; Goodman, M. F. *J. Biol. Chem.* **1987**, 262, 14689-14696. (b) Goodman, M. F.; Creighton, S.; Bloom, L. B.; Petruska, J. *Crit. Rev. Biochem. Mol. Biol.* **1993**, 28, 83-126.

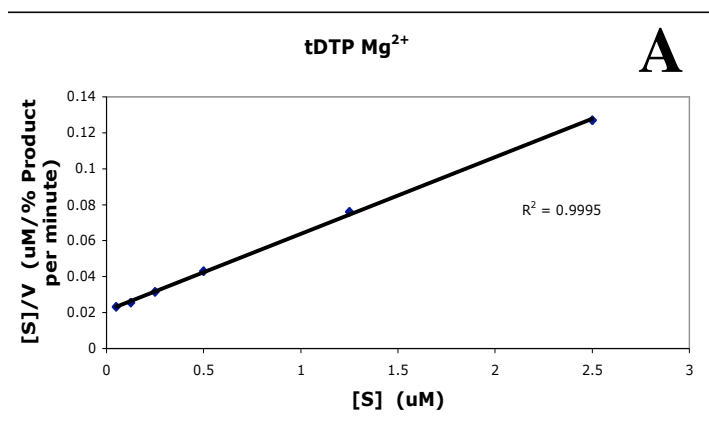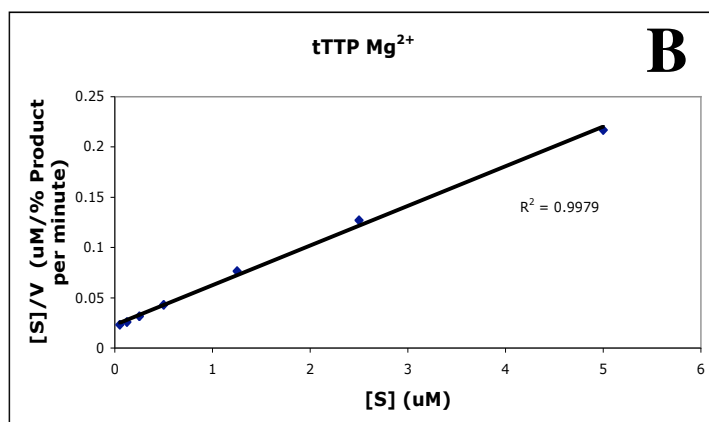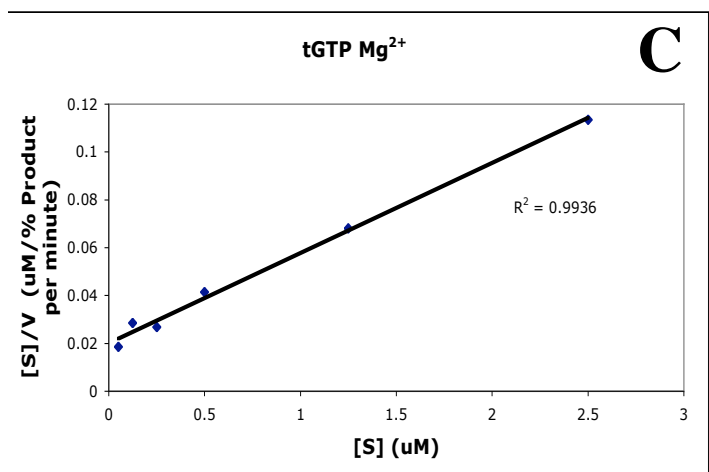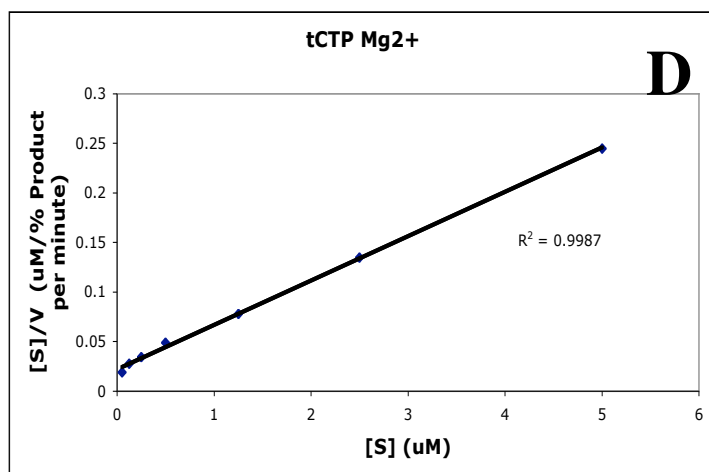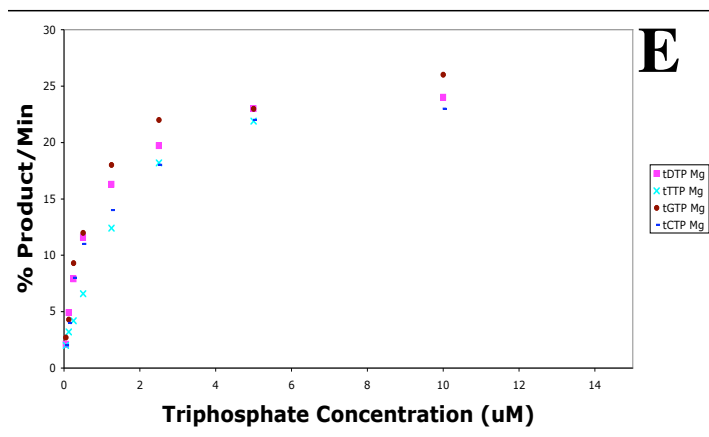

**Fig. 1 (supplementary).** A-D are Steady-State Hanes-Woolf plots for the incorporation of tNTPs by Terminator DNA Polymerase in the presence of Mg<sup>2+</sup> cations from which  $V_{max}$  and  $K_m$  values were determined to yield an overall insertion efficiency. **A.** tDTP opposite T. **B.** tTTP opposite A. **C.** tGTP opposite C. **D.** tCTP opposite G. **E.** Michaelis-Menten nonlinear regression plot showing all four tNTPs insertion velocities relative to substrate concentration.

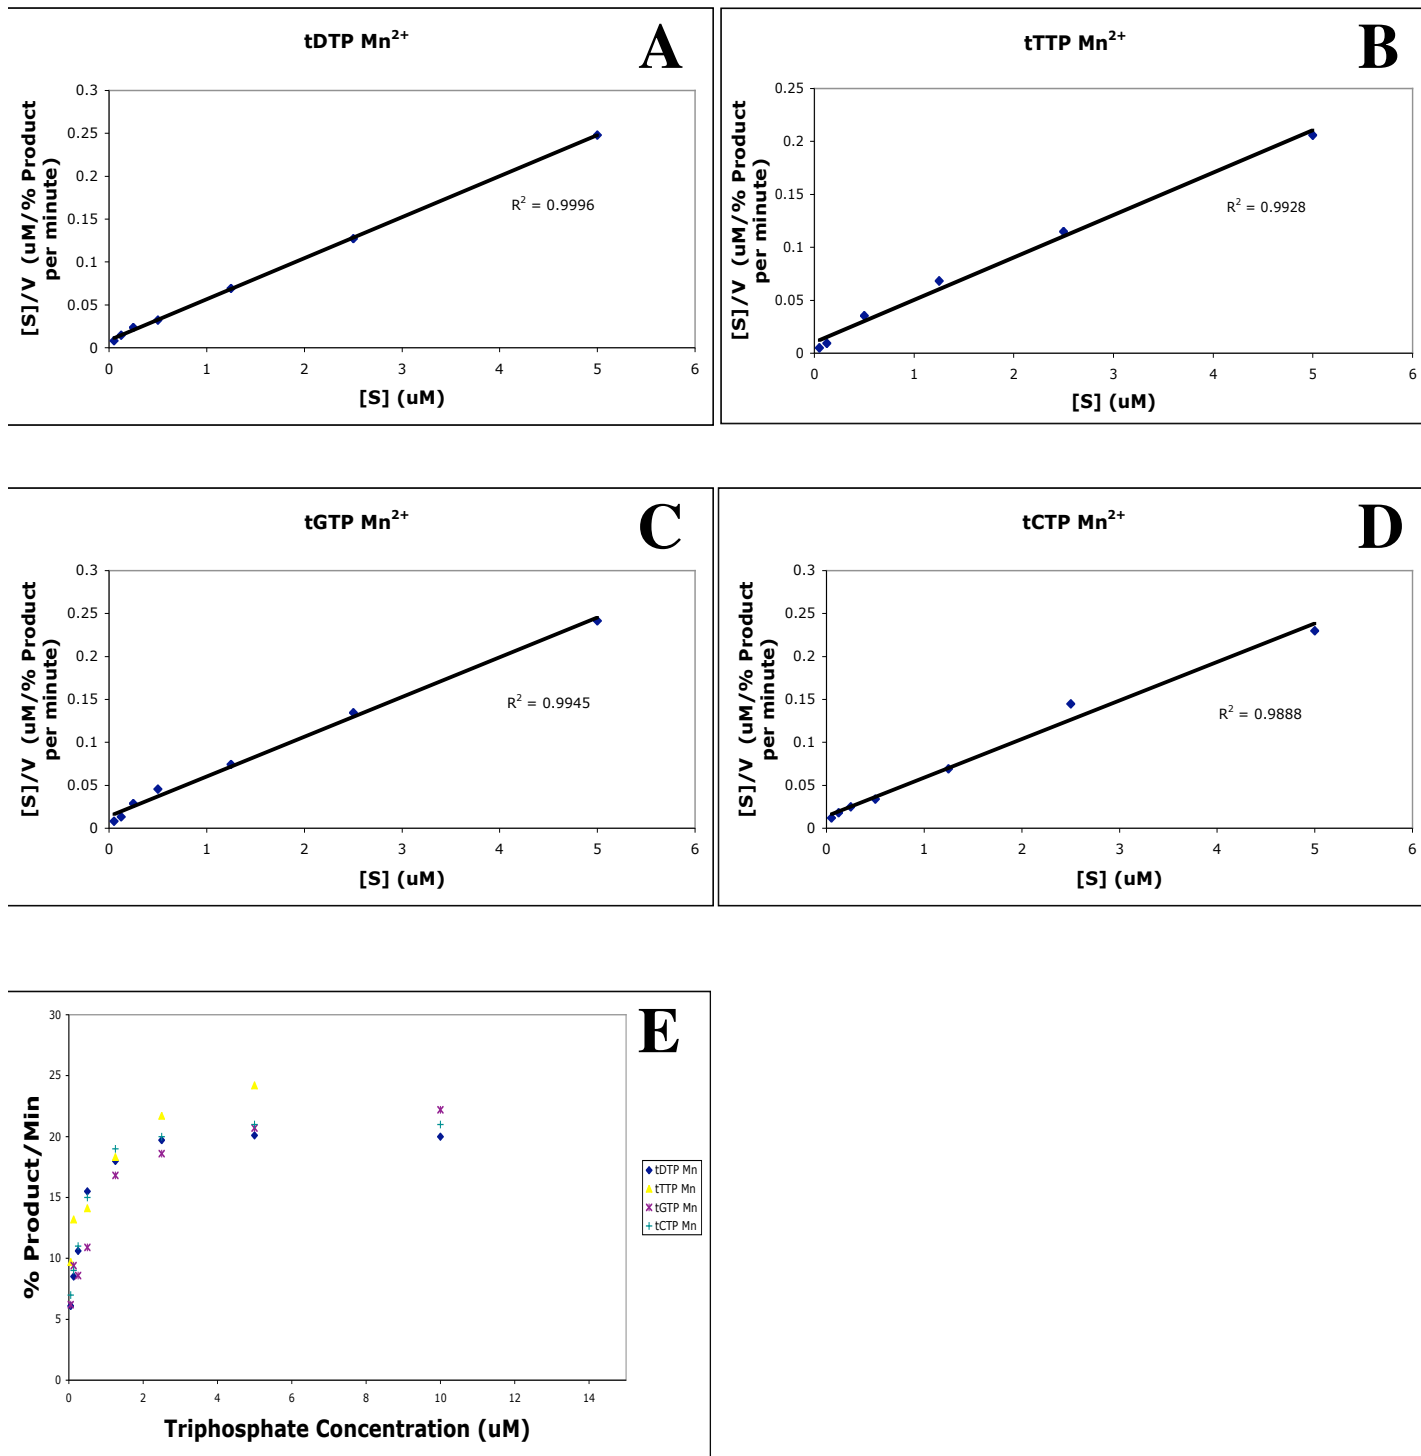

**Fig. 2 (supplementary).** A-D are Steady-State Hanes-Woolf plots for the incorporation of tNTPs by Therminator DNA Polymerase in the presence of Mn<sup>2+</sup> cations from which V<sub>max</sub> and K<sub>m</sub> values were determined to yield an overall insertion efficiency. **A.** tDTP opposite T. **B.** tTTP opposite A. **C.** tGTP opposite C. **D.** tCTP opposite G. **E.** Michealis-Menten nonlinear regression plot showing all four tNTPs insertion velocities relative to substrate concentration.

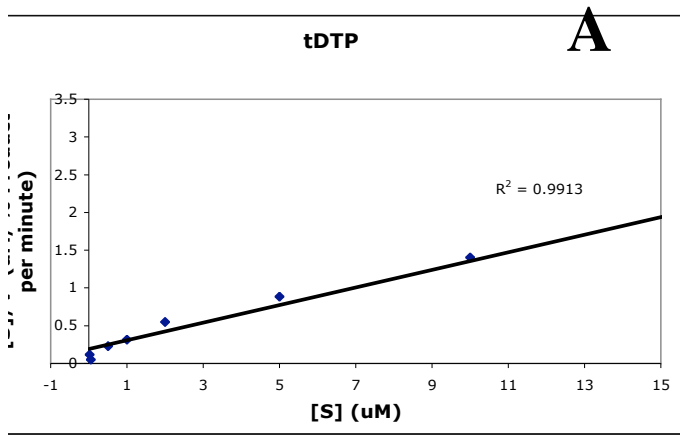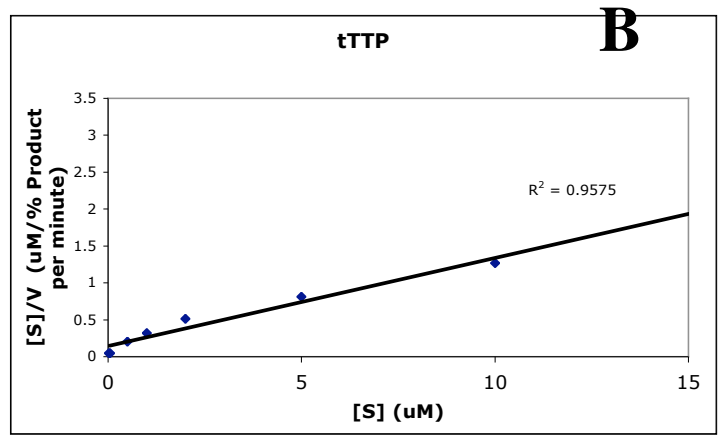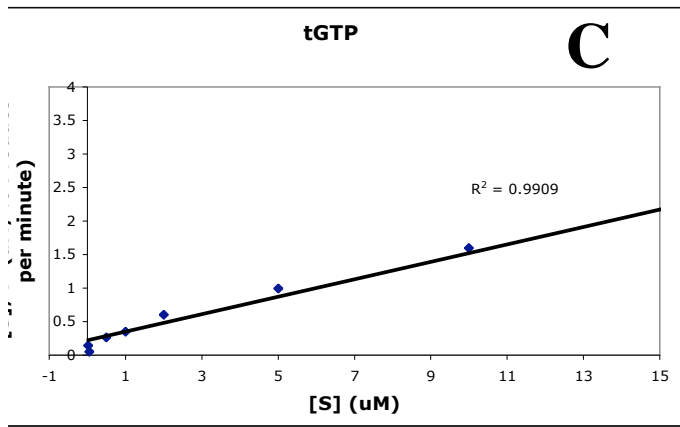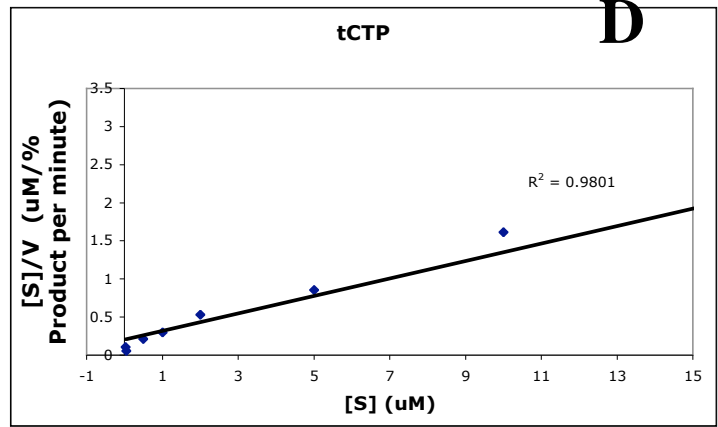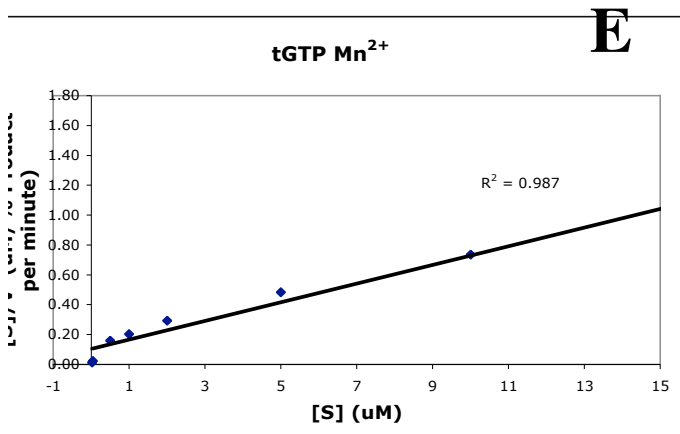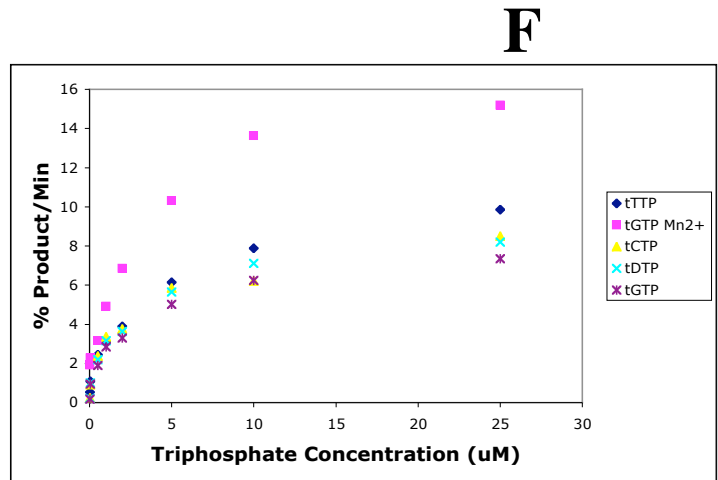

**Fig. 3 (supplementary).** A-E are Steady-State Hanes-Woolf plots for the incorporation of tNTPs by Deep Vent DNA Polymerase from which  $V_{max}$  and  $K_m$  values were determined to yield an overall insertion efficiency. **A.** tDTP opposite T. **B.** tTTP opposite A. **C.** tGTP opposite C. **D.** tCTP opposite G. **E.** tGTP opposite C with  $Mn^{2+}$ . **F.** Michealis-Menten nonlinear regression plot showing all four tNTPs insertion velocities relative to substrate concentration.

no NTP

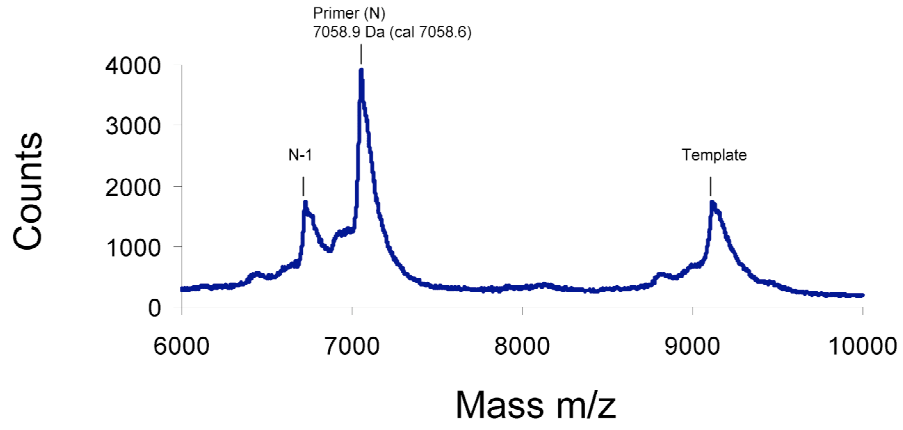

C

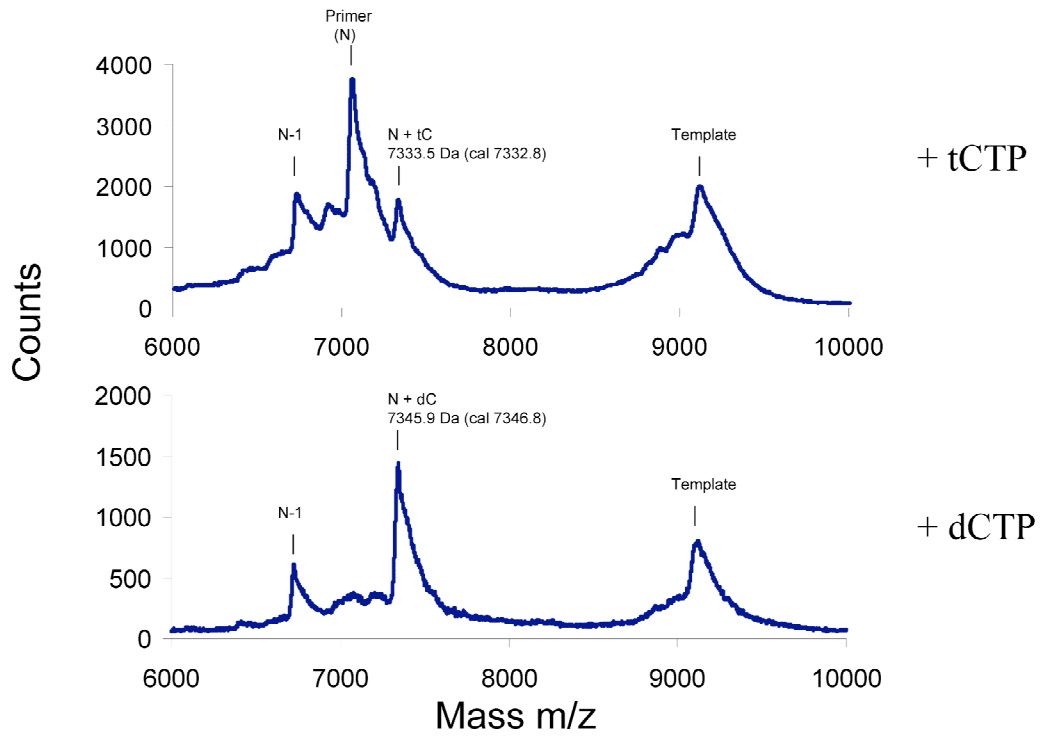

D

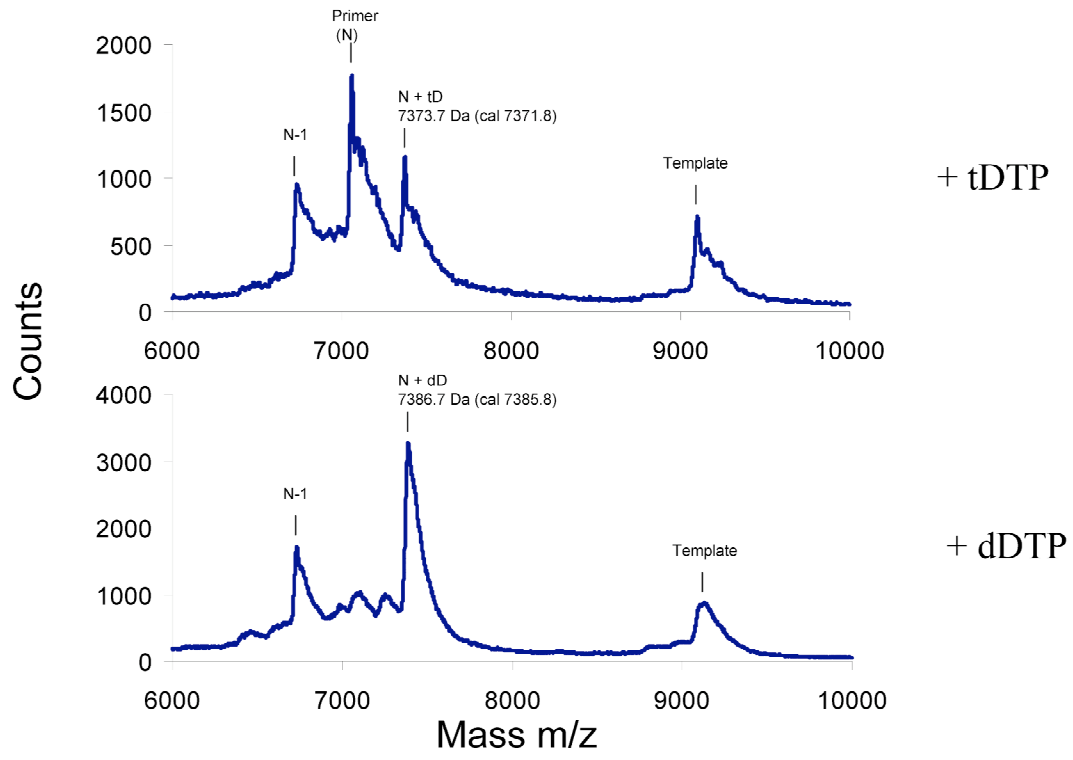



G

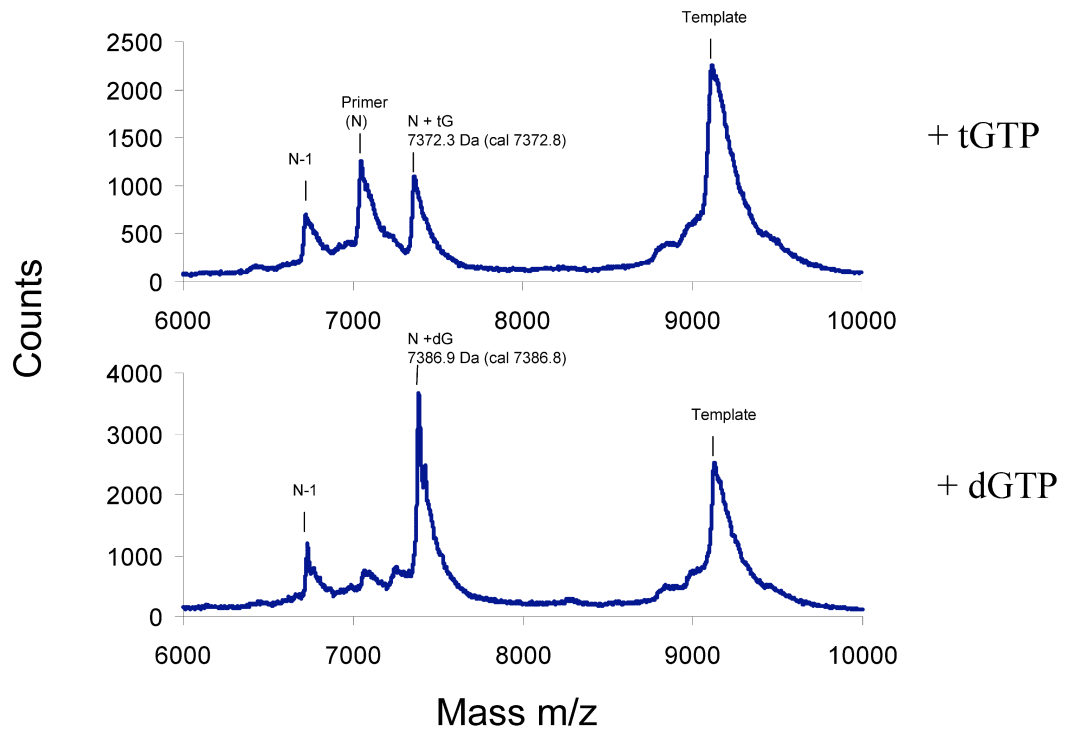

T

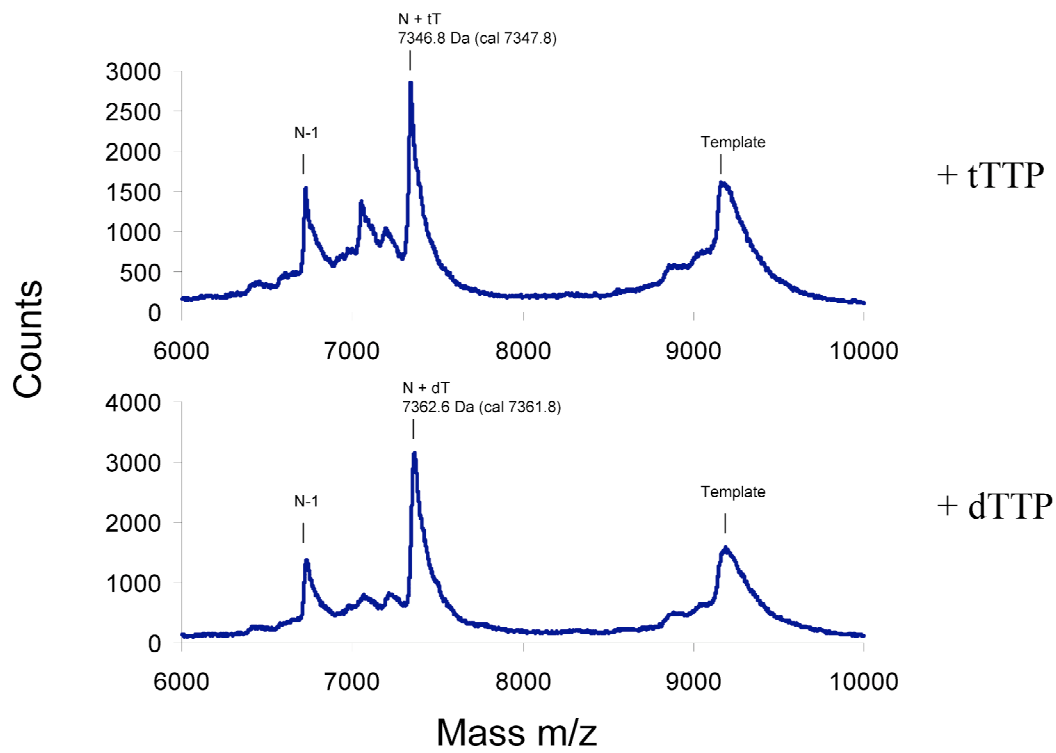

Supplement: ja0428255_si_001.pdf [file ja0428255_si_001.pdf]
